# Supplementary material
Source: PubMed Central journal article supplement (PMC3311223)
Supplement: NIHMS362730-supplement-01.pdf [file NIHMS362730-supplement-01.pdf]

**Supplementary Table 1.** Distribution of clinical and pathological features according to the presence or absence of first degree family history.

| Characteristic        | $\chi^2$ p-value | N (%)<br>First Degree | N (%)<br>Non-First or None |
|-----------------------|------------------|-----------------------|----------------------------|
| Age at Diagnosis      | 0.004            |                       |                            |
| $\leq 50$             |                  | 36 (32)               | 71 (19)                    |
| $> 50$                |                  | 76 (68)               | 297 (81)                   |
| Race <sup>1</sup>     | 0.61             |                       |                            |
| White                 |                  | 73 (65)               | 246 (67)                   |
| Black                 |                  | 38 (34)               | 114 (31)                   |
| Stage                 | 0.84             |                       |                            |
| I                     |                  | 97 (87)               | 316 (86)                   |
| II (T1, N1)           |                  | 15 (13)               | 52 (14)                    |
| Grade                 | 0.05             |                       |                            |
| High (=3)             |                  | 42 (38)               | 103 (28)                   |
| Low (<3)              |                  | 70 (63)               | 265 (72)                   |
| Tumor Size            | 0.39             |                       |                            |
| $\leq 1$ cm           |                  | 32 (29)               | 121 (33)                   |
| $> 1$ cm              |                  | 80 (71)               | 247 (67)                   |
| Nodal Status          | 0.78             |                       |                            |
| Positive              |                  | 17 (15)               | 52 (14)                    |
| Negative              |                  | 95 (85)               | 316 (86)                   |
| Histology             | 0.39             |                       |                            |
| IDC                   |                  | 100 (89)              | 317 (86)                   |
| LDC, mixed, other     |                  | 12 (11)               | 51 (14)                    |
| Estrogen Receptor     | 0.05             |                       |                            |
| Positive              |                  | 78 (70)               | 289 (79)                   |
| Negative              |                  | 34 (30)               | 79 (21)                    |
| Progesterone Receptor | 0.36             |                       |                            |
| Positive              |                  | 76 (68)               | 266 (72)                   |
| Negative              |                  | 36 (32)               | 102 (28)                   |
| HER-2/neu Status      | 0.80             |                       |                            |
| Positive              |                  | 24 (21)               | 80 (22)                    |
| Negative              |                  | 85 (76)               | 265 (72)                   |
| Distant Metastasis    | 0.52             |                       |                            |
| Yes                   |                  | 13 (12)               | 35 (9)                     |
| No                    |                  | 99 (88)               | 333 (91)                   |
